# Supplementary material for: Human cytomegalovirus escapes immune recognition by NK cells through the downregulation of B7-H6 by the viral genes US18 and US20
Source: PubMed Central journal article supplement (PMC5561058; doi:10.1038/s41598-017-08866-2), 2017-08-17
Supplement: 41598_2017_8866_MOESM1_ESM.pdf [file 41598_2017_8866_MOESM1_ESM.pdf]

## **Supplemental Information**

### **Human cytomegalovirus escapes immune recognition by NK cells through the downregulation of B7-H6 by the viral genes US18 and US20**

Yoav Charpak-Amikam, Tobias Kubsch, Einat Seidel, Esther Oiknine-Djian, Noemi Cavaletto, Rachel Yamin, Dominik Schmiedel, Dana Wolf, Giorgio Gribaudo, Martin Messerle, Luka Cicin-Sain, and Ofer Mandelboim

## Supplemental figures

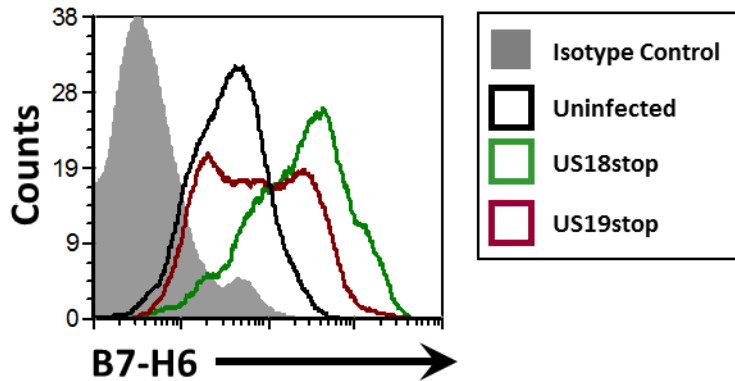

**Supplemental Figure S1 – HCMV US18stop fails to downregulate exogenously expressed FLAG-tagged B7-H6.** FACS staining of B7-H6 surface expression in ARPE19 cells overexpressing B7-H6-FLAG and infected with different HCMV strains. The filled gray histogram represents staining with an isotype control antibody. The black empty histogram represents uninfected cells. The green empty histogram represents cells infected with TB40/e US18stop. The red empty histogram represents cells infected with TB40/e HCMV US19stop. No significant differences were observed between isotype control stainings of each infection, so a representative isotype control staining derived from the uninfected cells sample is presented.

## Supplemental Tables

| #  | Name           | Sequence                                                   | Description                                                                     |
|----|----------------|------------------------------------------------------------|---------------------------------------------------------------------------------|
| 1  | US17-His F     | CCGCGGCCGCGCCGCCACCATGTCTCCGAAGCTCAGAGGCC                  | Forward primer used for amplification and cloning of HCMV US17-His              |
| 2  | US17-His R     | GGGATCCTTAATGATGATGATGATGATGATGCGCCATGGTTCGCGTGAG          | Reverse primer used for amplification and cloning of HCMV US17-His              |
| 3  | US18-His F     | AAGCGGCCGCGCCGCCACCATGGGCGACACCGC                          | Forward primer used for amplification and cloning of HCMV US18-His              |
| 4  | US18-His R     | AACTCGAGTTAATGATGATGATGATGATGATGCAACAAGCTGAGGAGACTCAC      | Reverse primer used for amplification and cloning of HCMV US18-His              |
| 5  | US19-His F     | CCGCGGCCGCGCCGCCACCATGCTTCATGTCGTCCCCTA                    | Forward primer used for amplification and cloning of HCMV US19-His              |
| 6  | US19-His R     | GGGATCCTCAATGATGATGATGATGATGATGTTGGCTCCACAACCAGAGC         | Reverse primer used for amplification and cloning of HCMV US19-His              |
| 7  | US20-His F     | AAGCGGCCGCGCCGCCACCATGCAGGCGCAGGAG                         | Forward primer used for amplification and cloning of HCMV US20-His              |
| 8  | US20-His R     | AACTCGAGTTAATGATGATGATGATGATGATGGACTTCCCCGTCGACTGG         | Reverse primer used for amplification and cloning of HCMV US20-His              |
| 9  | US20-HA F      | AAGGATCCGCCGCCACCATGCAGGCGCAGGAG                           | Forward primer used for amplification and cloning of HCMV US20-HA               |
| 10 | US20-HA R      | AAAGGTACCTTATACCATACGATGTTCCAGATTACGCTGGACTTCCCCGTCGACTGG  | Reverse primer used for amplification and cloning of HCMV US20-HA               |
| 11 | B7-H6-C'Flag F | AAAGGATCCGCCGCCACCATGACGTGGAGGGCTG                         | Forward primer used for amplification and cloning of human B7-H6                |
| 12 | B7-H6-C'Flag R | AAATGTACATTACTTGTGTCATCATGCTTTGTAGTCTGTAGGGGTAACAGTAAAGTTG | Reverse primer used for amplification and cloning of human B7-H6                |
| 13 | B7-H6 F        | TCACCAAGAGGCATTCCGAC                                       | Forward primer used to quantify B7-H6 in quantitative real-time PCR experiments |
| 14 | B7-H6 R        | TGGGGAAGCCACAACCTCAA                                       | Reverse primer used to quantify B7-H6 in quantitative real-time PCR experiments |
| 15 | US9 F          | AACGCCCTCAGACTTGGAAAC                                      | Forward primer used to quantify US9 in quantitative real-time PCR experiments   |
| 16 | US9 R          | CTACCTGGACACCGAAGCTG                                       | Reverse primer used to quantify US9 in quantitative real-time PCR experiments   |
| 17 | hUBC F         | ATTTGGGTCGCGGTTCTTG                                        | Forward primer used to quantify hUBC in quantitative real-time PCR experiments  |
| 18 | hUBC R         | TGCCTTGACATTCTCGATGGT                                      | Reverse primer used to quantify hUBC in quantitative real-time PCR experiments  |
| 19 | hHPRT F        | TGACACTGGCAAAAATGCA                                        | Forward primer used to quantify hHPRT in quantitative real-time PCR experiments |
| 20 | hHPRT R        | GGTCTTTTCACCAGCAAGCT                                       | Reverse primer used to quantify hHPRT in quantitative real-time PCR experiments |

**Supplemental Table S1 – DNA primers used in the study**

| # | Name                   | Sequence                                                             | Description                                                      |
|---|------------------------|----------------------------------------------------------------------|------------------------------------------------------------------|
| 1 | US14-16<br>deletion_fw | CCCCACGGATCTCGCGTCTTAGACGCGCGGTATATAGCCTCCGGCTGTCgattattcaacaagccac  | Forward primer used for deleting the HCMV US14-16 genomic region |
| 2 | US14-16<br>deletion_rv | GAGTGAACGGGTGAGCGTCTCGGTGGAGTCTTATAAACAGCGGGTctagaaaaactcatcgagcat   | Reverse primer used for deleting the HCMV US14-16 genomic region |
| 3 | US16-18<br>deletion_fw | ACTGTTTCATCGACGCTACCTTAGACCGACAGCGGTGTAAGCGGCAGCcgattattcaacaagccac  | Forward primer used for deleting the HCMV US16-18 genomic region |
| 4 | US16-18<br>deletion_rv | CGTTCTGGAAACGGCTGCTGTCCGAAAACAGTTCCGAAACGAAATtagaaaaactcatcgagcat    | Reverse primer used for deleting the HCMV US16-18 genomic region |
| 5 | US17-20<br>deletion_fw | AGAGAAGGGTAGGTGCGCCGACGCGCTTTGTGCCGAGACCGTCGCCACCCgattattcaacaagccac | Forward primer used for deleting the HCMV US17-20 genomic region |
| 6 | US17-20<br>deletion_rv | TTGGTGGAGACGGCCGCGCGGGTGGGGAAACGACGAGTTTTCCGtagaaaaactcatcgagcat     | Reverse primer used for deleting the HCMV US17-20 genomic region |
| 7 | US19-22<br>deletion_fw | TTTCGCGCAGCGCGCTTATCCGATTCGCTGTCGAGACGGCTTTGCCGGCcgattattcaacaagccac | Forward primer used for deleting the HCMV US19-22 genomic region |
| 8 | US19-22<br>deletion_rv | ACGTACAGAGTGTGGTCAAACCGTGGCGCACCCGTATCCGACCCGTCGtagaaaaactcatcgagcat | Reverse primer used for deleting the HCMV US19-22 genomic region |

**Supplemental Table S2 – DNA primers used for the generation of HCMV block deletion mutants**

| #  | Name                | Sequence                                                                            | Description                                                            |
|----|---------------------|-------------------------------------------------------------------------------------|------------------------------------------------------------------------|
| 1  | US17up-Kan_fw       | ACACTCTATAAACGGTTTCTCATACGCGCCTTTTGATAGCCACCGCGTCCCGGAATTGC<br>CAGCTGGGGCGCCC       | Forward primer used in the cloning of the kanamycin cassette into US17 |
| 2  | US17down-<br>Kan_rv | CGCGGGGGTGGGGCGCCAGGCCGTCCCGGTGGCCTCTGAGTTCGGAGAGGCCGCT<br>CTAGAAGTGTGGATCC         | Reverse primer used in the cloning of the kanamycin cassette into US17 |
| 3  | US17STOPinsrt_f     | CTCATACGCGCCTTTTGATAGCCACCGCGTCTAATCTCCGAACTCAGAGGCCACCGGG<br>ACGGCCTGGGGCGCCCCACCC | Forward primer used in the insertion of stop codon into US17           |
| 4  | US17STOPinsrt_r     | GGGTGGGGCGCCAGGCCGTCCCGGTGGCCTCTGAGTTCGGAGATTAGACGGCGGT<br>GGTATCAAAAGCGCGTATGAG    | Reverse primer used in the insertion of stop codon into US17           |
| 5  | US18up-Kann_fw      | ACTGTTTCATCGACGCTACCTTAGACCGACAGCGGTCTAAGCGGCAGCCCGGAATT<br>GCCAGCTGGGGCGCCC        | Forward primer used in the cloning of the kanamycin cassette into US18 |
| 6  | US18down-<br>Kan_rv | ATGGTGACCGTCGGCGACTCATGGTGTTCGAAACCGAGGGGTGTGCCGGCGGCTC<br>TAGAACTAGTGGATCC         | Reverse primer used in the cloning of the kanamycin cassette into US18 |
| 7  | US18STOPinsrt_f     | GACGCCTACCTTAGACCGACAGCGGTCTAAGCGGCAGCTAAGGCGACACCGCCTC<br>GGTTCCGAAACCATGAGTCGCC   | Forward primer used in the insertion of stop codon into US18           |
| 8  | US18STOPinsrt_r     | GGCGACTCATGGTGTTCGAAACCGAGGGGTGTGCCCTTAGCTGCGCTTACGAC<br>CGCTGTGGTCTAAGTAGGCGTC     | Reverse primer used in the insertion of stop codon into US18           |
| 9  | US19down-<br>Kan_rv | AGGTAGGGGACTACCTCTCGACGCTCCATTCTAGCGGGACGACATGAAGGGCCG<br>CTTAGAACTAGTGGATCC        | Forward primer used in the cloning of the kanamycin cassette into US19 |
| 10 | US19up-Kan_fw       | CTAATGCCTATAAAACCGCGCCCTTTTCACAGCAGCCGCGCTTGTGCGCCCGGAAT<br>TGCCAGCTGGGGCGCCC       | Reverse primer used in the cloning of the kanamycin cassette into US19 |
| 11 | US19STOPinsrt_f     | AAAACCGCGCCGTTTTTCACAGCAGCCGCGCTTGTCCCTAACTCATGTGCTCCCG<br>CTAGAATGAGCCGTGAGGAGGTA  | Forward primer used in the insertion of stop codon into US19           |
| 12 | US19STOPinsrt_r     | TACCTCTCGACGGTCCATTCTAGCGGGACGACATGAAGTTAGGCGACAAGCGCGG<br>CTGCTGTGAAAACGGGCGCGTTTT | Reverse primer used in the insertion of stop codon into US19           |
| 13 | US20down-<br>Kan_rv | TCGAGAGCCTCCATGCGGGAGAGCAGCAGCGCTTAGCCTCTGCGCCTGGGCCG<br>CTTAGAACTAGTGGATCC         | Forward primer used in the cloning of the kanamycin cassette into US20 |
| 14 | US20up-Kan_fw       | AGAGAAGGGTAGGTGCGCCGACGCGCTTTGTGCCGAGACCGTCGCCACCCCGGA<br>ATTGCCAGCTGGGGCGCCC       | Reverse primer used in the cloning of the kanamycin cassette into US20 |
| 15 | US20STOPinsrt_f     | GGTGGCCGACGCGCTTTGTGCCGAGACCGTCGCCACCTAACAGGCGCAGGAGG<br>CTAACGCGCTGCTCTCCCGCAT     | Forward primer used in the insertion of stop codon into US20           |
| 16 | US20STOPinsrt_r     | ATGCGGGAGAGCAGCAGCGCTTAGCCTCTGCGCCTGTTAGGTGGCGACGGTCT<br>CGGCACAAAGCCGTGCGGGCACC    | Reverse primer used in the insertion of stop codon into US20           |

**Supplemental Table S3 – DNA primers used for the generation of HCMV translation stop mutants**
